# Supplementary material for: Ataxia-telangiectasia mutated kinase regulates ribonucleotide reductase and mitochondrial homeostasis
Source: JCI journal article supplement (doi:10.1172/jci31604), 2007-09-04
Supplement: sd1 [file 1]

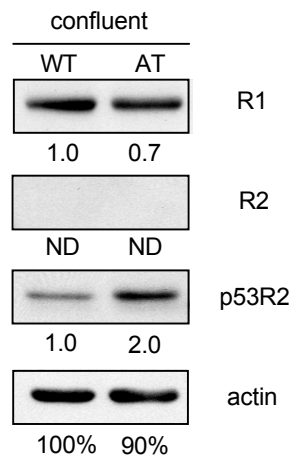

**Supplementary Figure 1.** Western blot analysis of RR subunits in wild-type (WT) and A-T primary fibroblasts after 7 days in culture (100% confluence). The numbers (%) below the actin blot represent the relative loading to which the signals were normalized. The numbers below the R1 and p53R2 blots represent the relative fold change of each compared to the wild-type signal (given a value of 1.0). The RR subunit R1 is reduced and p53R2 is up-regulated in the A-T cells. The S-phase induced R2 subunit is not detectable (ND) in either WT or A-T protein samples, confirming that the cells in both cultures are in  $G_0$  and not cycling.
